# Supplementary material for: Suboptimal Choice in Pigeons: Stimulus Value Predicts Choice over Frequencies
Source: PLoS One. 2016 Jul 21;11(7):e0159336. doi: 10.1371/journal.pone.0159336 (PMC4956316; doi:10.1371/journal.pone.0159336)
Supplement: S1 Dataset — This file contains all data used in the statistical and mathematical models of the present experiments. (XLSX) [file pone.0159336.s001.xlsx]

## Sheet: Exp 1 Stats
Statistical Models used for Each Dependent Variable in Experiment 1
Bird	Phase	Session	Choice Discriminative			Bird	Phase	Trial Type*	Latency to Respond to Initial Links			Bird	Phase	Trial Type*	Number of Terminal Link Pecks
20	1	1	58.3333			20	1	1	0.0187004			20	1	1	2.41667
20	1	2	45.8333			135	1	1	0.3204			135	1	1	19.7
20	1	3	62.5			245	1	1	0.36266			245	1	1	25.7333
20	1	4	70.8333			254	1	1	0.616763			254	1	1	7.33333
20	1	5	79.1667			257	1	1	0.203562			257	1	1	3.43333
20	1	6	66.6667			1056	1	1	0.0852152			1056	1	1	3.55
20	1	7	66.6667			4074	1	1	0.320784			4074	1	1	10.5833
20	1	8	58.3333			19227	1	1	0.764174			19227	1	1	5.25
20	1	9	79.1667			19229	1	1	0.798608			19229	1	1	15.3667
20	1	10	66.6667			22642	1	1	0.120754			22642	1	1	5.45
20	1	11	75			20	1	2	0.563326			20	1	2	3.20833
20	1	12	91.6667			135	1	2	1.41115			135	1	2	17.4083
20	1	13	87.5			245	1	2	0.978653			245	1	2	22.2333
20	1	14	95.8333			254	1	2	2.02895			254	1	2	4.625
20	1	15	95.8333			257	1	2	0.768437			257	1	2	4.61667
20	1	16	95.8333			1056	1	2	0.419259			1056	1	2	4.09167
20	1	17	95.8333			4074	1	2	0.787461			4074	1	2	10.55
20	1	18	91.6667			19227	1	2	1.05252			19227	1	2	2.94167
20	1	19	91.6667			19229	1	2	1.48095			19229	1	2	10.7083
20	1	20	95.8333			22642	1	2	0.538144			22642	1	2	6.08333
20	1	21	95.8333			20	2	1	0.210336			20	2	1	2.96667
20	1	22	91.6667			135	2	1	0.237993			135	2	1	15.6667
20	1	23	95.8333			245	2	1	0.353286			245	2	1	13.1667
20	1	24	100			254	2	1	1.32352			254	2	1	6.86667
20	1	25	95.8333			257	2	1	0.191064			257	2	1	3.06667
135	1	1	45.8333			1056	2	1	0.390421			1056	2	1	4.6
135	1	2	54.1667			4074	2	1	0.533368			4074	2	1	15
135	1	3	50			19227	2	1	0.794625			19227	2	1	8.3
135	1	4	66.6667			19229	2	1	0.723257			19229	2	1	16.2333
135	1	5	87.5			22642	2	1	0.119676			22642	2	1	6.56667
135	1	6	54.1667			20	2	2	0.794936			20	2	2	1.66667
135	1	7	58.3333			135	2	2	0.614231			135	2	2	14.925
135	1	8	50			245	2	2	1.28831			245	2	2	11.975
135	1	9	50			254	2	2	1.38829			254	2	2	6.83333
135	1	10	58.3333			257	2	2	0.922428			257	2	2	4.80833
135	1	11	70.8333			1056	2	2	1.07889			1056	2	2	3.29167
135	1	12	83.3333			4074	2	2	0.951598			4074	2	2	12.7417
135	1	13	79.1667			19227	2	2	1.16242			19227	2	2	4.39167
135	1	14	87.5			19229	2	2	1.10143			19229	2	2	7.05
135	1	15	91.6667			22642	2	2	0.7698			22642	2	2	7.5
135	1	16	100			20	3	1	0.225287			20	3	1	4.26667
135	1	17	100			135	3	1	0.160663			135	3	1	14.5333
135	1	18	95.8333			245	3	1	0.474588			245	3	1	8.53333
135	1	19	95.8333			254	3	1	1.4744			254	3	1	8.53333
135	1	20	91.6667			257	3	1	0.354473			257	3	1	3.46667
135	1	21	100			1056	3	1	1.49858			1056	3	1	3.33333
135	1	22	100			4074	3	1	0.970855			4074	3	1	11.1333
135	1	23	100			19227	3	1	0.334117			19227	3	1	13.2
135	1	24	100			19229	3	1	1.1684			19229	3	1	11.0667
135	1	25	100			22642	3	1	-0.0239356			22642	3	1	5.53333
245	1	1	54.1667			20	3	2	0.96915			20	3	2	2.83333
245	1	2	58.3333			135	3	2	0.655665			135	3	2	12.5333
245	1	3	45.8333			245	3	2	0.578004			245	3	2	7.75833
245	1	4	54.1667			254	3	2	1.33318			254	3	2	10.4583
245	1	5	50			257	3	2	0.604392			257	3	2	4.55833
245	1	6	62.5			1056	3	2	1.64458			1056	3	2	1.775
245	1	7	83.3333			4074	3	2	0.911777			4074	3	2	8.55
245	1	8	70.8333			19227	3	2	0.79147			19227	3	2	10.0083
245	1	9	50			19229	3	2	1.11339			19229	3	2	6.19167
245	1	10	37.5			22642	3	2	0.628509			22642	3	2	4.35833
245	1	11	54.1667
245	1	12	62.5					* 1 = Discriminative 2 = NonDiscriminative						* 1 = Discriminative 2 = NonDiscriminative
245	1	13	70.8333
245	1	14	66.6667
245	1	15	54.1667
245	1	16	66.6667
245	1	17	79.1667
245	1	18	70.8333
245	1	19	70.8333
245	1	20	70.8333
245	1	21	54.1667
245	1	22	50
245	1	23	79.1667
245	1	24	66.6667
245	1	25	87.5
254	1	1	50
254	1	2	58.3333
254	1	3	58.3333
254	1	4	62.5
254	1	5	62.5
254	1	6	79.1667
254	1	7	91.6667
254	1	8	95.8333
254	1	9	83.3333
254	1	10	79.1667
254	1	11	100
254	1	12	95.8333
254	1	13	87.5
254	1	14	95.8333
254	1	15	95.8333
254	1	16	100
254	1	17	100
254	1	18	100
254	1	19	100
254	1	20	100
254	1	21	95.8333
254	1	22	95.8333
254	1	23	95.8333
254	1	24	100
254	1	25	95.8333
257	1	1	58.3333
257	1	2	58.3333
257	1	3	66.6667
257	1	4	70.8333
257	1	5	66.6667
257	1	6	83.3333
257	1	7	83.3333
257	1	8	79.1667
257	1	9	100
257	1	10	95.8333
257	1	11	100
257	1	12	100
257	1	13	100
257	1	14	100
257	1	15	95.8333
257	1	16	95.8333
257	1	17	100
257	1	18	100
257	1	19	100
257	1	20	100
257	1	21	100
257	1	22	100
257	1	23	91.6667
257	1	24	95.8333
257	1	25	100
1056	1	1	79.1667
1056	1	2	45.8333
1056	1	3	54.1667
1056	1	4	41.6667
1056	1	5	50
1056	1	6	62.5
1056	1	7	66.6667
1056	1	8	58.3333
1056	1	9	79.1667
1056	1	10	87.5
1056	1	11	75
1056	1	12	87.5
1056	1	13	83.3333
1056	1	14	79.1667
1056	1	15	91.6667
1056	1	16	91.6667
1056	1	17	91.6667
1056	1	18	95.8333
1056	1	19	95.8333
1056	1	20	83.3333
1056	1	21	87.5
1056	1	22	83.3333
1056	1	23	87.5
1056	1	24	83.3333
1056	1	25	100
4074	1	1	54.1667
4074	1	2	50
4074	1	3	50
4074	1	4	50
4074	1	5	45.8333
4074	1	6	58.3333
4074	1	7	45.8333
4074	1	8	50
4074	1	9	58.3333
4074	1	10	45.8333
4074	1	11	54.1667
4074	1	12	54.1667
4074	1	13	50
4074	1	14	62.5
4074	1	15	45.8333
4074	1	16	62.5
4074	1	17	50
4074	1	18	45.8333
4074	1	19	50
4074	1	20	50
4074	1	21	62.5
4074	1	22	50
4074	1	23	50
4074	1	24	45.8333
4074	1	25	62.5
19227	1	1	33.3333
19227	1	2	62.5
19227	1	3	54.1667
19227	1	4	45.8333
19227	1	5	58.3333
19227	1	6	33.3333
19227	1	7	37.5
19227	1	8	45.8333
19227	1	9	75
19227	1	10	70.8333
19227	1	11	66.6667
19227	1	12	70.8333
19227	1	13	66.6667
19227	1	14	66.6667
19227	1	15	83.3333
19227	1	16	75
19227	1	17	83.3333
19227	1	18	87.5
19227	1	19	83.3333
19227	1	20	91.6667
19227	1	21	91.6667
19227	1	22	83.3333
19227	1	23	87.5
19227	1	24	83.3333
19227	1	25	91.6667
19229	1	1	58.3333
19229	1	2	33.3333
19229	1	3	54.1667
19229	1	4	50
19229	1	5	45.8333
19229	1	6	58.3333
19229	1	7	58.3333
19229	1	8	70.8333
19229	1	9	70.8333
19229	1	10	58.3333
19229	1	11	58.3333
19229	1	12	62.5
19229	1	13	91.6667
19229	1	14	95.8333
19229	1	15	91.6667
19229	1	16	100
19229	1	17	100
19229	1	18	95.8333
19229	1	19	100
19229	1	20	95.8333
19229	1	21	100
19229	1	22	100
19229	1	23	100
19229	1	24	100
19229	1	25	95.8333
22642	1	1	54.1667
22642	1	2	54.1667
22642	1	3	79.1667
22642	1	4	87.5
22642	1	5	87.5
22642	1	6	100
22642	1	7	91.6667
22642	1	8	100
22642	1	9	100
22642	1	10	100
22642	1	11	100
22642	1	12	100
22642	1	13	100
22642	1	14	100
22642	1	15	100
22642	1	16	100
22642	1	17	91.6667
22642	1	18	100
22642	1	19	100
22642	1	20	100
22642	1	21	100
22642	1	22	100
22642	1	23	100
22642	1	24	95.8333
22642	1	25	100
20	2	1	95.8333
20	2	2	100
20	2	3	100
20	2	4	100
20	2	5	100
20	2	6	100
20	2	7	95.8333
20	2	8	100
20	2	9	100
20	2	10	91.6667
20	2	11	70.8333
20	2	12	100
20	2	13	100
20	2	14	100
20	2	15	70.8333
20	2	16	100
20	2	17	91.6667
20	2	18	100
20	2	19	100
20	2	20	100
20	2	21	100
20	2	22	100
20	2	23	100
20	2	24	95.8333
20	2	25	100
135	2	1	100
135	2	2	95.8333
135	2	3	95.8333
135	2	4	100
135	2	5	91.6667
135	2	6	95.8333
135	2	7	75
135	2	8	66.6667
135	2	9	58.3333
135	2	10	54.1667
135	2	11	70.8333
135	2	12	54.1667
135	2	13	79.1667
135	2	14	95.8333
135	2	15	100
135	2	16	100
135	2	17	100
135	2	18	95.8333
135	2	19	91.6667
135	2	20	91.6667
135	2	21	87.5
135	2	22	100
135	2	23	83.3333
135	2	24	95.8333
135	2	25	79.1667
245	2	1	95.8333
245	2	2	91.6667
245	2	3	95.8333
245	2	4	95.8333
245	2	5	95.8333
245	2	6	100
245	2	7	91.6667
245	2	8	100
245	2	9	95.8333
245	2	10	83.3333
245	2	11	95.8333
245	2	12	95.8333
245	2	13	87.5
245	2	14	95.8333
245	2	15	87.5
245	2	16	87.5
245	2	17	91.6667
245	2	18	87.5
245	2	19	91.6667
245	2	20	87.5
245	2	21	75
245	2	22	95.8333
245	2	23	83.3333
245	2	24	87.5
245	2	25	100
254	2	1	95.8333
254	2	2	95.8333
254	2	3	95.8333
254	2	4	79.1667
254	2	5	62.5
254	2	6	79.1667
254	2	7	54.1667
254	2	8	50
254	2	9	50
254	2	10	62.5
254	2	11	50
254	2	12	58.3333
254	2	13	70.8333
254	2	14	79.1667
254	2	15	75
254	2	16	62.5
254	2	17	58.3333
254	2	18	54.1667
254	2	19	58.3333
254	2	20	91.6667
254	2	21	70.8333
254	2	22	75
254	2	23	66.6667
254	2	24	66.6667
254	2	25	70.8333
257	2	1	100
257	2	2	100
257	2	3	100
257	2	4	95.8333
257	2	5	100
257	2	6	95.8333
257	2	7	100
257	2	8	95.8333
257	2	9	100
257	2	10	100
257	2	11	87.5
257	2	12	100
257	2	13	100
257	2	14	100
257	2	15	100
257	2	16	100
257	2	17	100
257	2	18	100
257	2	19	100
257	2	20	100
257	2	21	91.6667
257	2	22	100
257	2	23	100
257	2	24	100
257	2	25	100
1056	2	1	95.8333
1056	2	2	91.6667
1056	2	3	91.6667
1056	2	4	91.6667
1056	2	5	91.6667
1056	2	6	100
1056	2	7	83.3333
1056	2	8	79.1667
1056	2	9	79.1667
1056	2	10	83.3333
1056	2	11	83.3333
1056	2	12	83.3333
1056	2	13	100
1056	2	14	83.3333
1056	2	15	91.6667
1056	2	16	100
1056	2	17	91.6667
1056	2	18	87.5
1056	2	19	79.1667
1056	2	20	95.8333
1056	2	21	87.5
1056	2	22	79.1667
1056	2	23	83.3333
1056	2	24	70.8333
1056	2	25	91.6667
4074	2	1	50
4074	2	2	54.1667
4074	2	3	50
4074	2	4	45.8333
4074	2	5	50
4074	2	6	50
4074	2	7	50
4074	2	8	54.1667
4074	2	9	45.8333
4074	2	10	54.1667
4074	2	11	45.8333
4074	2	12	58.3333
4074	2	13	58.3333
4074	2	14	70.8333
4074	2	15	62.5
4074	2	16	45.8333
4074	2	17	50
4074	2	18	50
4074	2	19	50
4074	2	20	62.5
4074	2	21	58.3333
4074	2	22	54.1667
4074	2	23	70.8333
4074	2	24	70.8333
4074	2	25	62.5
19227	2	1	87.5
19227	2	2	87.5
19227	2	3	83.3333
19227	2	4	91.6667
19227	2	5	83.3333
19227	2	6	70.8333
19227	2	7	70.8333
19227	2	8	54.1667
19227	2	9	58.3333
19227	2	10	54.1667
19227	2	11	50
19227	2	12	70.8333
19227	2	13	70.8333
19227	2	14	70.8333
19227	2	15	75
19227	2	16	62.5
19227	2	17	66.6667
19227	2	18	75
19227	2	19	79.1667
19227	2	20	75
19227	2	21	83.3333
19227	2	22	79.1667
19227	2	23	87.5
19227	2	24	75
19227	2	25	87.5
19229	2	1	100
19229	2	2	91.6667
19229	2	3	91.6667
19229	2	4	100
19229	2	5	100
19229	2	6	100
19229	2	7	100
19229	2	8	100
19229	2	9	100
19229	2	10	95.8333
19229	2	11	50
19229	2	12	91.6667
19229	2	13	100
19229	2	14	87.5
19229	2	15	100
19229	2	16	100
19229	2	17	95.8333
19229	2	18	95.8333
19229	2	19	100
19229	2	20	100
19229	2	21	100
19229	2	22	100
19229	2	23	100
19229	2	24	100
19229	2	25	100
22642	2	1	100
22642	2	2	100
22642	2	3	100
22642	2	4	91.6667
22642	2	5	100
22642	2	6	100
22642	2	7	100
22642	2	8	100
22642	2	9	100
22642	2	10	95.8333
22642	2	11	95.8333
22642	2	12	100
22642	2	13	100
22642	2	14	100
22642	2	15	100
22642	2	16	95.8333
22642	2	17	100
22642	2	18	100
22642	2	19	100
22642	2	20	100
22642	2	21	95.8333
22642	2	22	100
22642	2	23	100
22642	2	24	95.8333
22642	2	25	100
20	3	1	100
20	3	2	95.8333
20	3	3	95.8333
20	3	4	91.6667
20	3	5	100
20	3	6	100
20	3	7	95.8333
20	3	8	91.6667
20	3	9	95.8333
20	3	10	87.5
20	3	11	95.8333
20	3	12	100
20	3	13	100
20	3	14	95.8333
20	3	15	91.6667
20	3	16	91.6667
135	3	1	87.5
135	3	2	62.5
135	3	3	75
135	3	4	83.3333
135	3	5	66.6667
135	3	6	70.8333
135	3	7	79.1667
135	3	8	70.8333
135	3	9	58.3333
135	3	10	58.3333
135	3	11	54.1667
135	3	12	54.1667
135	3	13	58.3333
135	3	14	54.1667
135	3	15	62.5
135	3	16	54.1667
245	3	1	95.8333
245	3	2	95.8333
245	3	3	100
245	3	4	95.8333
245	3	5	95.8333
245	3	6	83.3333
245	3	7	91.6667
245	3	8	75
245	3	9	87.5
245	3	10	87.5
245	3	11	91.6667
245	3	12	79.1667
245	3	13	91.6667
245	3	14	87.5
245	3	15	66.6667
245	3	16	75
254	3	1	66.6667
254	3	2	58.3333
254	3	3	50
254	3	4	58.3333
254	3	5	54.1667
254	3	6	62.5
254	3	7	54.1667
254	3	8	70.8333
254	3	9	62.5
254	3	10	66.6667
254	3	11	66.6667
254	3	12	70.8333
254	3	13	75
254	3	14	79.1667
254	3	15	83.3333
254	3	16	83.3333
257	3	1	100
257	3	2	100
257	3	3	100
257	3	4	100
257	3	5	100
257	3	6	100
257	3	7	100
257	3	8	95.8333
257	3	9	100
257	3	10	100
257	3	11	100
257	3	12	100
257	3	13	100
257	3	14	100
257	3	15	100
257	3	16	91.6667
1056	3	1	79.1667
1056	3	2	75
1056	3	3	75
1056	3	4	62.5
1056	3	5	70.8333
1056	3	6	58.3333
1056	3	7	58.3333
1056	3	8	62.5
1056	3	9	66.6667
1056	3	10	62.5
1056	3	11	62.5
1056	3	12	70.8333
1056	3	13	58.3333
1056	3	14	54.1667
1056	3	15	54.1667
1056	3	16	54.1667
4074	3	1	50
4074	3	2	66.6667
4074	3	3	62.5
4074	3	4	79.1667
4074	3	5	54.1667
4074	3	6	62.5
4074	3	7	79.1667
4074	3	8	62.5
4074	3	9	75
4074	3	10	70.8333
4074	3	11	70.8333
4074	3	12	66.6667
4074	3	13	66.6667
4074	3	14	66.6667
4074	3	15	54.1667
4074	3	16	75
19227	3	1	79.1667
19227	3	2	87.5
19227	3	3	83.3333
19227	3	4	70.8333
19227	3	5	70.8333
19227	3	6	66.6667
19227	3	7	70.8333
19227	3	8	62.5
19227	3	9	54.1667
19227	3	10	54.1667
19227	3	11	58.3333
19227	3	12	66.6667
19227	3	13	75
19227	3	14	70.8333
19227	3	15	75
19227	3	16	79.1667
19229	3	1	95.8333
19229	3	2	100
19229	3	3	100
19229	3	4	95.8333
19229	3	5	95.8333
19229	3	6	95.8333
19229	3	7	100
19229	3	8	95.8333
19229	3	9	95.8333
19229	3	10	100
19229	3	11	100
19229	3	12	100
19229	3	13	95.8333
19229	3	14	100
19229	3	15	87.5
19229	3	16	87.5
22642	3	1	100
22642	3	2	100
22642	3	3	91.6667
22642	3	4	91.6667
22642	3	5	95.8333
22642	3	6	95.8333
22642	3	7	100
22642	3	8	91.6667
22642	3	9	87.5
22642	3	10	95.8333
22642	3	11	95.8333
22642	3	12	100
22642	3	13	100
22642	3	14	95.8333
22642	3	15	91.6667
22642	3	16	100

## Sheet: Exp 1 Choice
Percent Choice Discriminative Alternative for Each Subject Across Sessions
Phase 1	20	135	245	254	257	1056	4074	19227	19229	22642
1	58.3333	45.8333	54.1667	50	58.3333	79.1667	54.1667	33.3333	58.3333	54.1667
2	45.8333	54.1667	58.3333	58.3333	58.3333	45.8333	50	62.5	33.3333	54.1667
3	62.5	50	45.8333	58.3333	66.6667	54.1667	50	54.1667	54.1667	79.1667
4	70.8333	66.6667	54.1667	62.5	70.8333	41.6667	50	45.8333	50	87.5
5	79.1667	87.5	50	62.5	66.6667	50	45.8333	58.3333	45.8333	87.5
6	66.6667	54.1667	62.5	79.1667	83.3333	62.5	58.3333	33.3333	58.3333	100
7	66.6667	58.3333	83.3333	91.6667	83.3333	66.6667	45.8333	37.5	58.3333	91.6667
8	58.3333	50	70.8333	95.8333	79.1667	58.3333	50	45.8333	70.8333	100
9	79.1667	50	50	83.3333	100	79.1667	58.3333	75	70.8333	100
10	66.6667	58.3333	37.5	79.1667	95.8333	87.5	45.8333	70.8333	58.3333	100
11	75	70.8333	54.1667	100	100	75	54.1667	66.6667	58.3333	100
12	91.6667	83.3333	62.5	95.8333	100	87.5	54.1667	70.8333	62.5	100
13	87.5	79.1667	70.8333	87.5	100	83.3333	50	66.6667	91.6667	100
14	95.8333	87.5	66.6667	95.8333	100	79.1667	62.5	66.6667	95.8333	100
15	95.8333	91.6667	54.1667	95.8333	95.8333	91.6667	45.8333	83.3333	91.6667	100
16	95.8333	100	66.6667	100	95.8333	91.6667	62.5	75	100	100
17	95.8333	100	79.1667	100	100	91.6667	50	83.3333	100	91.6667
18	91.6667	95.8333	70.8333	100	100	95.8333	45.8333	87.5	95.8333	100
19	91.6667	95.8333	70.8333	100	100	95.8333	50	83.3333	100	100
20	95.8333	91.6667	70.8333	100	100	83.3333	50	91.6667	95.8333	100
21	95.8333	100	54.1667	95.8333	100	87.5	62.5	91.6667	100	100
22	91.6667	100	50	95.8333	100	83.3333	50	83.3333	100	100
23	95.8333	100	79.1667	95.8333	91.6667	87.5	50	87.5	100	100
24	100	100	66.6667	100	95.8333	83.3333	45.8333	83.3333	100	95.8333
25	95.8333	100	87.5	95.8333	100	100	62.5	91.6667	95.8333	100
Phase 2	20	135	245	254	257	1056	4074	19227	19229	22642
26	95.8333	100	95.8333	95.8333	100	95.8333	50	87.5	100	100
27	100	95.8333	91.6667	95.8333	100	91.6667	54.1667	87.5	91.6667	100
28	100	95.8333	95.8333	95.8333	100	91.6667	50	83.3333	91.6667	100
29	100	100	95.8333	79.1667	95.8333	91.6667	45.8333	91.6667	100	91.6667
30	100	91.6667	95.8333	62.5	100	91.6667	50	83.3333	100	100
31	100	95.8333	100	79.1667	95.8333	100	50	70.8333	100	100
32	95.8333	75	91.6667	54.1667	100	83.3333	50	70.8333	100	100
33	100	66.6667	100	50	95.8333	79.1667	54.1667	54.1667	100	100
34	100	58.3333	95.8333	50	100	79.1667	45.8333	58.3333	100	100
35	91.6667	54.1667	83.3333	62.5	100	83.3333	54.1667	54.1667	95.8333	95.8333
36	70.8333	70.8333	95.8333	50	87.5	83.3333	45.8333	50	50	95.8333
37	100	54.1667	95.8333	58.3333	100	83.3333	58.3333	70.8333	91.6667	100
38	100	79.1667	87.5	70.8333	100	100	58.3333	70.8333	100	100
39	100	95.8333	95.8333	79.1667	100	83.3333	70.8333	70.8333	87.5	100
40	70.8333	100	87.5	75	100	91.6667	62.5	75	100	100
41	100	100	87.5	62.5	100	100	45.8333	62.5	100	95.8333
42	91.6667	100	91.6667	58.3333	100	91.6667	50	66.6667	95.8333	100
43	100	95.8333	87.5	54.1667	100	87.5	50	75	95.8333	100
44	100	91.6667	91.6667	58.3333	100	79.1667	50	79.1667	100	100
45	100	91.6667	87.5	91.6667	100	95.8333	62.5	75	100	100
46	100	87.5	75	70.8333	91.6667	87.5	58.3333	83.3333	100	95.8333
47	100	100	95.8333	75	100	79.1667	54.1667	79.1667	100	100
48	100	83.3333	83.3333	66.6667	100	83.3333	70.8333	87.5	100	100
49	95.8333	95.8333	87.5	66.6667	100	70.8333	70.8333	75	100	95.8333
50	100	79.1667	100	70.8333	100	91.6667	62.5	87.5	100	100
Phase 3	20	135	245	254	257	1056	4074	19227	19229	22642
51	100	87.5	95.8333	66.6667	100	79.1667	50	79.1667	95.8333	100
52	95.8333	62.5	95.8333	58.3333	100	75	66.6667	87.5	100	100
53	95.8333	75	100	50	100	75	62.5	83.3333	100	91.6667
54	91.6667	83.3333	95.8333	58.3333	100	62.5	79.1667	70.8333	95.8333	91.6667
55	100	66.6667	95.8333	54.1667	100	70.8333	54.1667	70.8333	95.8333	95.8333
56	100	70.8333	83.3333	62.5	100	58.3333	62.5	66.6667	95.8333	95.8333
57	95.8333	79.1667	91.6667	54.1667	100	58.3333	79.1667	70.8333	100	100
58	91.6667	70.8333	75	70.8333	95.8333	62.5	62.5	62.5	95.8333	91.6667
59	95.8333	58.3333	87.5	62.5	100	66.6667	75	54.1667	95.8333	87.5
60	87.5	58.3333	87.5	66.6667	100	62.5	70.8333	54.1667	100	95.8333
61	95.8333	54.1667	91.6667	66.6667	100	62.5	70.8333	58.3333	100	95.8333
62	100	54.1667	79.1667	70.8333	100	70.8333	66.6667	66.6667	100	100
63	100	58.3333	91.6667	75	100	58.3333	66.6667	75	95.8333	100
64	95.8333	54.1667	87.5	79.1667	100	54.1667	66.6667	70.8333	100	95.8333
65	91.6667	62.5	66.6667	83.3333	100	54.1667	54.1667	75	87.5	91.6667
66	91.6667	54.1667	75	83.3333	91.6667	54.1667	75	79.1667	87.5	100

## Sheet: Exp 1 Latency
Average Latencies to Respond to the Discrimiantive Alternative's Initial Link during Forced Choice Trials on the Last 5 Sessions of Each Phase for Each Subject														Average Latencies to Respond to the Nondiscrimiantive Alternative's Initial Link during Forced Choice Trials on the Last 5 Sessions of Each Phase for Each Subject
Phase 1 Measured (centiseconds, .01")	20	135	245	254	257	1056	4074	19227	19229	22642				Phase 1 Measured (centiseconds, .01")	20	135	245	254	257	1056	4074	19227	19229	22642
21	100.292	109.833	1104.71	758.625	113.708	168.958	163.5	621.458	418.583	124.667				21	340.75	505.708	1205.08	10312.7	1118.46	520.167	281.625	770.208	2775.83	477
22	79.1667	97.5833	167.583	1035.12	172.625	132.75	271.208	373.542	226.292	225.292				22	153.875	2101.92	2259.33	19521.4	412.625	378.667	1886.08	2117.71	1988.5	202.417
23	135.417	224.208	194.375	294.792	224.125	98.2917	152.375	846.5	920.042	165.667				23	527.458	9507.67	412.083	5188.33	636.708	231.75	567.833	1176.12	3322.12	159.333
24	110.208	87.5	121.542	194.833	168.958	106.833	243.792	650.583	2202.12	102.542				24	592.25	1287.92	658.167	16416.5	585.292	141.958	428.917	745	5827.42	1083.29
25	104.667	1902.08	148.75	268.917	140.167	113.25	243.875	517.833	512.792	84.1667				25	400.25	8735.54	1059.12	8138.62	404.292	192.625	669.083	1280.96	2376.46	294.375
Phase 1 Converted & Logged (seconds, 1.00")	20	135	245	254	257	1056	4074	19227	19229	22642				Phase 1 Converted & Logged (seconds, 1.00")	20	135	245	254	257	1056	4074	19227	19229	22642
21	0.00126485	0.0407342	1.04325	0.880027	0.0557923	0.22778	0.213518	0.793412	0.621782	0.0957503				21	0.532436	0.7039	1.08102	2.01337	1.04862	0.716143	0.449671	0.886608	1.44339	0.678518
22	-0.101458	-0.0106244	0.224231	1.01499	0.237104	0.123035	0.433303	0.572339	0.354669	0.352745				22	0.187168	1.32262	1.35398	2.29051	0.615556	0.578257	1.27556	1.32587	1.29853	0.306246
23	0.131672	0.350652	0.28864	0.469515	0.35049	-0.0074833	0.182914	0.927627	0.963807	0.219235				23	0.722188	1.97807	0.614985	1.71503	0.803941	0.36502	0.754221	1.07045	1.52142	0.202307
24	0.0422144	-0.0579919	0.0847252	0.289663	0.22778	0.0287068	0.387019	0.813303	1.34284	0.0109004				24	0.772505	1.10989	0.818336	2.21528	0.767372	0.152161	0.632373	0.872156	1.76548	1.03475
25	0.0198084	1.27923	0.172457	0.429618	0.146645	0.0540382	0.387167	0.71419	0.709941	-0.0748599				25	0.602331	1.94129	1.02495	1.91055	0.606695	0.284713	0.82548	1.10754	1.37593	0.468901
Phase 2 Measured (centiseconds, .01")	20	135	245	254	257	1056	4074	19227	19229	22642				Phase 2 Measured (centiseconds, .01")	20	135	245	254	257	1056	4074	19227	19229	22642
46	430.667	245.292	144.792	2277.92	165.208	204.458	148.25	1553.83	1048.04	79.5833				46	543.875	206.792	1461.71	374.083	636	244.042	424.667	1633.96	551.542	552.875
47	161.292	91.75	848.292	982.75	114.833	262.917	1457.75	650.5	684.75	244.667				47	952.792	544.333	4026.33	2422.54	1197.54	691.625	329.333	1644.21	686.417	3831.21
48	77.9583	191.417	174.083	4254.08	185	291.208	254.958	242.458	201.5	184				48	330.25	373.875	5465.25	1247.79	822.458	2593.5	2777	1604.08	938.958	243.875
49	106.417	282.792	157.542	8417.79	170.292	117.708	770.208	382.542	245.458	106.875				49	392.167	468.125	994.667	15630.5	488.375	2296.17	1346.58	815.208	3137.04	667.667
50	195.458	127.125	173.375	517.125	150.958	486.042	109.417	1002.67	1164.46	103.583				50	1405.62	597.958	864	4944.04	1338.21	2467.29	1095.21	1846.83	2882.79	204.792
Phase 2 Converted & Logged (seconds, 1.00")	20	135	245	254	257	1056	4074	19227	19229	22642				Phase 2 Converted & Logged (seconds, 1.00")	20	135	245	254	257	1056	4074	19227	19229	22642
46	0.634141	0.389683	0.160744	1.35754	0.218032	0.310605	0.170995	1.1914	1.02038	-0.0991779				46	0.735499	0.315533	1.16486	0.572968	0.803457	0.387464	0.628048	1.21324	0.741578	0.742627
47	0.207612	-0.0373939	0.928545	0.992443	0.060068	0.419818	1.16368	0.813247	0.835532	0.388575				47	0.978998	0.735865	1.60491	1.38427	1.07829	0.839871	0.517636	1.21596	0.836588	1.58334
48	-0.108137	0.28198	0.240757	1.62881	0.267172	0.464204	0.406469	0.384637	0.304275	0.264818				48	0.518843	0.572726	1.73761	1.09614	0.915114	1.41389	1.44358	1.20523	0.972646	0.387167
49	0.0270097	0.451467	0.197395	1.9252	0.231193	0.0708072	0.886608	0.582679	0.389978	0.0288761				49	0.593471	0.670362	0.997678	2.19397	0.688753	1.361	1.12923	0.911269	1.49652	0.82456
50	0.291054	0.104231	0.238986	0.713596	0.178857	0.686674	0.0390835	1.00116	1.06612	0.0152899				50	1.14787	0.776671	0.936514	1.69408	1.12652	1.39222	1.0395	1.26643	1.45981	0.311312
Phase 3 Measured (centiseconds, .01")	20	135	245	254	257	1056	4074	19227	19229	22642				Phase 3 Measured (centiseconds, .01")
62	107.45	133.1	248.787	3352.91	257.688	2727.99	620.462	222.812	1079.12	89.025				62	20	135	245	254	257	1056	4074	19227	19229	22642
63	134.762	132.531	223.703	2375.56	241.25	2672.42	675.766	250.125	1298.03	90.2188				63	937.013	395.859	254.438	1639.83	364.188	4623.08	1308.77	755.094	1357.86	336.516
64	209.012	138.292	271.417	3119.98	270.083	2473.48	865.562	268.792	1229.83	95.6458				64	1015.92	385.146	309.354	2116.98	370.479	6065.23	506.604	607.562	1610.85	410.646
65	204.613	148.719	338.281	3506.47	274.812	3460.44	1244.22	169.406	1765.75	92.8438				65	970.263	491.531	393.625	2580.62	371.094	7428.38	697.875	533.75	1395.09	442.125
66	216.05	175.25	461.875	2702.69	128.312	4985.75	1583.31	184.562	2285	106.438				66	881.95	700.188	677.812	3557.12	362.188	1895	621.562	520	949.812	764.875
Phase 3 Converted & Logged (seconds, 1.00")	20	135	245	254	257	1056	4074	19227	19229	22642				Phase 3 Converted & Logged (seconds, 1.00")	20	135	245	254	257	1056	4074	19227	19229	22642
62	0.0312064	0.124178	0.395829	1.52542	0.411093	1.43584	0.792716	0.34794	1.03307	-0.050488				62	0.934808	0.558394	0.567791	1.16256	0.763456	1.62663	1.10009	0.852419	1.1048	0.472939
63	0.129569	0.122318	0.349672	1.37577	0.382467	1.42691	0.829796	0.398157	1.11329	-0.0447032				63	0.971745	0.597541	0.405581	1.2148	0.561325	1.66493	1.11686	0.878001	1.13285	0.527005
64	0.320172	0.140796	0.433637	1.49415	0.431498	1.39331	0.937298	0.429416	1.08985	-0.0193339				64	1.00686	0.585625	0.490456	1.32572	0.568764	1.78285	0.704669	0.783591	1.20706	0.613467
65	0.310932	0.172366	0.529278	1.54487	0.439036	1.53913	1.0949	0.228929	1.24693	-0.0322473				65	0.986889	0.691551	0.595083	1.41172	0.569484	1.87089	0.843778	0.727338	1.1446	0.645545
66	0.334554	0.243658	0.664524	1.4318	0.108269	1.69773	1.19957	0.266143	1.35889	0.0270947				66	0.945444	0.845214	0.83111	1.5511	0.558933	1.27761	0.793485	0.716003	0.977638	0.88359

## Sheet: Exp 1 Resp Rates
Average Number of Responses to the Discriminative Alternative's Predictive Stimulus during Forced Choice Trials on the Last 5 Session of Each Phase for Each Subject														Average Number of Responses to the Nondiscriminative Alternative's Nonpredictive Stimulus during Forced Choice Trials on the Last 5 Session of Each Phase for Each Subject
Phase 1	20	135	245	254	257	1056	4074	19227	19229	22642				Phase 1	20	135	245	254	257	1056	4074	19227	19229	22642
21	1.83333	20.75	27.5833	5.5	3	4.33333	11.4167	5.25	17.9167	6.91667				21	3.66667	15.6667	22.625	4.66667	4.95833	5	9.83333	2.16667	10.25	6.79167
22	2.33333	21.0833	24.75	8.66667	4	3.25	10.6667	4.83333	15.8333	5.33333				22	4.29167	15.9583	22.375	4.375	5.75	5.70833	14.8333	2.20833	12.2917	7.70833
23	3.33333	19.9167	25.75	8.91667	3.58333	2.83333	9.66667	5.75	11.8333	6.08333				23	3.16667	18	21.75	5.41667	4.79167	3.625	11.75	3.08333	10.25	5.41667
24	2.83333	17.8333	25.4167	7.91667	3.33333	4.33333	10.3333	5.33333	13.8333	5.08333				24	3.45833	20	22.375	2.625	3.45833	3.33333	7.45833	3	9.70833	5.83333
25	1.75	18.9167	25.1667	5.66667	3.25	3	10.8333	5.08333	17.4167	3.83333				25	1.45833	17.4167	22.0417	6.04167	4.125	2.79167	8.875	4.25	11.0417	4.66667
Phase 1	20	135	245	254	257	1056	4074	19227	19229	22642				Phase 1	20	135	245	254	257	1056	4074	19227	19229	22642
46	3.83333	17.8333	13.3333	9.16667	3	3.66667	14.5	6.83333	19.8333	5.83333				46	1.95833	14.75	12.1667	8.375	4.5	3.33333	13.1667	2.625	4.5	7.875
47	2.66667	16.6667	15	5.33333	3.16667	6.33333	14.5	3.5	12.1667	7.33333				47	2.04167	15.125	11.875	6.75	4.95833	5.08333	13.2917	4.45833	8.08333	8.83333
48	2.66667	14	11.8333	5.33333	3.66667	4.5	15.5	12.1667	11	7.33333				48	1.375	13.5833	11.7917	4.58333	5.04167	2.875	12.4167	3.875	6.625	7.375
49	2.33333	14	13.6667	4.83333	3	5.66667	12	9.5	20.6667	7.33333				49	1.83333	15.4167	12.375	6.5	4.33333	3	13.0833	6.33333	9.41667	7.54167
50	3.33333	15.8333	12	9.66667	2.5	2.83333	18.5	9.5	17.5	5				50	1.125	15.75	11.6667	7.95833	5.20833	2.16667	11.75	4.66667	6.625	5.875
Phase 1	20	135	245	254	257	1056	4074	19227	19229	22642				Phase 1	20	135	245	254	257	1056	4074	19227	19229	22642
62	7	14	8	9.66667	3	3.66667	11.3333	9	8.66667	7				62	4.70833	13.75	9.04167	10.5833	4.95833	2.70833	9.25	6.29167	5.375	4.70833
63	3.33333	14.3333	10	11.6667	2.66667	1.66667	10.3333	9	9.33333	3.33333				63	5.08333	12.3333	8.20833	11.875	6.04167	1.375	9.25	9.25	4.875	5.08333
64	5.33333	15.3333	10.3333	7.66667	4	3.33333	10.3333	11.6667	11.3333	5.33333				64	3.58333	12.2083	9.29167	9.04167	5.16667	1.58333	8.08333	11.9583	7.20833	3.58333
65	4	13.6667	6.33333	8.66667	4	5.33333	11	19	12.3333	5.33333				65	0.416667	11.375	6	11.9167	3.29167	1.45833	8.66667	13.2083	5	3.91667
66	1.66667	15.3333	8	5	3.66667	2.66667	12.6667	17.3333	13.6667	6.66667				66	0.375	13	6.25	8.875	3.33333	1.75	7.5	9.33333	8.5	4.5

## Sheet: Exp 2 Stats
Statistical Models used for Each Dependent Variable in Experiment 1
Bird	Phase	Session	Choice Discriminative			Bird	Phase	Trial Type*	Latency to Respond to Initial Links			Bird	Phase	Trial Type*	Number of Terminal Link Pecks
20	4	1	4.16667			20	4	1	0.619442			20	4	1	1.46667
20	4	2	0			135	4	1	0.122609			135	4	1	21.2
20	4	3	0			245	4	1	0.358992			245	4	1	10.9667
20	4	4	0			254	4	1	0.813429			254	4	1	1.11667
20	4	5	0			257	4	1	0.494937			257	4	1	7.76667
20	4	6	8.33333			1056	4	1	1.08447			1056	4	1	2.38333
20	4	7	4.16667			4074	4	1	0.349577			4074	4	1	9.31667
20	4	8	25			19227	4	1	0.522246			19227	4	1	7.65
20	4	9	25			19229	4	1	0.143188			19229	4	1	7.25
20	4	10	29.1667			22642	4	1	0.0950521			22642	4	1	7.58333
20	4	11	33.3333			20	4	2	0.763057			20	4	2	1.06667
20	4	12	41.6667			135	4	2	0.628652			135	4	2	19.9
20	4	13	41.6667			245	4	2	0.421935			245	4	2	8.8
20	4	14	41.6667			254	4	2	0.669416			254	4	2	5.23333
20	4	15	37.5			257	4	2	0.748858			257	4	2	10.4833
20	4	16	33.3333			1056	4	2	1.00153			1056	4	2	1.675
20	4	17	45.8333			4074	4	2	0.900814			4074	4	2	6.85
20	4	18	41.6667			19227	4	2	0.90975			19227	4	2	5.85
20	4	19	45.8333			19229	4	2	1.39504			19229	4	2	10.1167
20	4	20	50			22642	4	2	0.437984			22642	4	2	12.0583
20	4	21	37.5			20	5	1	0.534481			20	5	1	2.75
20	4	22	50			135	5	1	0.0955049			135	5	1	19.5167
20	4	23	41.6667			245	5	1	0.21246			245	5	1	11.1167
20	4	24	37.5			254	5	1	0.611104			254	5	1	0.95
20	4	25	41.6667			257	5	1	0.619516			257	5	1	11.15
20	4	26	45.8333			1056	5	1	0.9395			1056	5	1	1.56667
20	4	27	50			4074	5	1	0.831628			4074	5	1	7.41667
20	4	28	50			19227	5	1	0.579407			19227	5	1	4.51667
20	4	29	50			19229	5	1	0.29325			19229	5	1	3.83333
20	4	30	50			22642	5	1	-0.008389			22642	5	1	7.15
20	4	31	50			20	5	2	0.635413			20	5	2	2.4
20	4	32	50			135	5	2	0.312562			135	5	2	19.1167
20	4	33	50			245	5	2	0.168057			245	5	2	9.53333
20	4	34	50			254	5	2	1.03083			254	5	2	2.8
20	4	35	50			257	5	2	0.730563			257	5	2	12.925
20	4	36	45.8333			1056	5	2	0.529355			1056	5	2	0.991667
20	4	37	50			4074	5	2	0.801947			4074	5	2	6.34167
20	4	38	50			19227	5	2	0.688013			19227	5	2	3.4
20	4	39	45.8333			19229	5	2	1.04608			19229	5	2	7.3
20	4	40	41.6667			22642	5	2	0.458847			22642	5	2	7.475
20	4	41	50			20	6	1	0.47602			20	6	1	0.833333
20	4	42	50			135	6	1	0.193542			135	6	1	17.15
20	4	43	50			245	6	1	0.26579			245	6	1	6
20	4	44	50			254	6	1	0.374717			254	6	1	0.383333
20	4	45	45.8333			257	6	1	0.35821			257	6	1	15.8167
20	4	46	45.8333			1056	6	1	0.372571			1056	6	1	1.9
20	4	47	50			4074	6	1	0.272945			4074	6	1	5.36667
20	4	48	54.1667			19227	6	1	0.440201			19227	6	1	1.8
20	4	49	54.1667			19229	6	1	0.493595			19229	6	1	4.48333
20	4	50	50			22642	6	1	0.335758			22642	6	1	5.76667
20	4	51	50			20	6	2	0.527869			20	6	2	0.458333
20	4	52	50			135	6	2	0.440609			135	6	2	18.1917
20	4	53	54.1667			245	6	2	0.157104			245	6	2	4.75
20	4	54	50			254	6	2	0.732973			254	6	2	3.81667
20	4	55	45.8333			257	6	2	0.604059			257	6	2	15.625
135	4	1	16.6667			1056	6	2	0.598321			1056	6	2	1.08333
135	4	2	8.33333			4074	6	2	0.819835			4074	6	2	3.225
135	4	3	8.33333			19227	6	2	0.600236			19227	6	2	2.925
135	4	4	8.33333			19229	6	2	0.851337			19229	6	2	3.20833
135	4	5	20.8333			22642	6	2	0.321513			22642	6	2	6.88333
135	4	6	20.8333					* 1 = Discriminative 2 = NonDiscriminative						* 1 = Discriminative 2 = NonDiscriminative
135	4	7	25
135	4	8	41.6667
135	4	9	45.8333
135	4	10	45.8333
135	4	11	45.8333
135	4	12	50
135	4	13	45.8333
135	4	14	50
135	4	15	50
135	4	16	50
135	4	17	41.6667
135	4	18	58.3333
135	4	19	54.1667
135	4	20	50
135	4	21	50
135	4	22	50
135	4	23	50
135	4	24	54.1667
135	4	25	62.5
135	4	26	75
135	4	27	62.5
135	4	28	54.1667
135	4	29	70.8333
135	4	30	62.5
135	4	31	62.5
135	4	32	62.5
135	4	33	70.8333
135	4	34	66.6667
135	4	35	70.8333
135	4	36	87.5
135	4	37	70.8333
135	4	38	66.6667
135	4	39	58.3333
135	4	40	75
135	4	41	58.3333
135	4	42	70.8333
135	4	43	79.1667
135	4	44	75
135	4	45	70.8333
135	4	46	87.5
135	4	47	87.5
135	4	48	87.5
135	4	49	87.5
135	4	50	83.3333
135	4	51	79.1667
135	4	52	91.6667
135	4	53	87.5
135	4	54	75
135	4	55	91.6667
245	4	1	25
245	4	2	16.6667
245	4	3	8.33333
245	4	4	16.6667
245	4	5	0
245	4	6	4.16667
245	4	7	4.16667
245	4	8	4.16667
245	4	9	4.16667
245	4	10	4.16667
245	4	11	33.3333
245	4	12	29.1667
245	4	13	29.1667
245	4	14	41.6667
245	4	15	45.8333
245	4	16	37.5
245	4	17	50
245	4	18	58.3333
245	4	19	50
245	4	20	66.6667
245	4	21	62.5
245	4	22	79.1667
245	4	23	87.5
245	4	24	75
245	4	25	75
245	4	26	70.8333
245	4	27	79.1667
245	4	28	75
245	4	29	75
245	4	30	79.1667
245	4	31	87.5
245	4	32	79.1667
245	4	33	91.6667
245	4	34	91.6667
245	4	35	79.1667
245	4	36	87.5
245	4	37	91.6667
245	4	38	95.8333
245	4	39	100
245	4	40	91.6667
245	4	41	100
245	4	42	87.5
245	4	43	100
245	4	44	91.6667
245	4	45	100
245	4	46	100
245	4	47	95.8333
245	4	48	100
245	4	49	100
245	4	50	100
245	4	51	91.6667
245	4	52	100
245	4	53	100
245	4	54	95.8333
245	4	55	95.8333
254	4	1	8.33333
254	4	2	16.6667
254	4	3	4.16667
254	4	4	12.5
254	4	5	20.8333
254	4	6	16.6667
254	4	7	29.1667
254	4	8	37.5
254	4	9	45.8333
254	4	10	45.8333
254	4	11	41.6667
254	4	12	50
254	4	13	45.8333
254	4	14	45.8333
254	4	15	54.1667
254	4	16	33.3333
254	4	17	66.6667
254	4	18	50
254	4	19	50
254	4	20	45.8333
254	4	21	50
254	4	22	58.3333
254	4	23	50
254	4	24	45.8333
254	4	25	66.6667
254	4	26	62.5
254	4	27	62.5
254	4	28	70.8333
254	4	29	83.3333
254	4	30	70.8333
254	4	31	41.6667
254	4	32	75
254	4	33	66.6667
254	4	34	70.8333
254	4	35	62.5
254	4	36	75
254	4	37	54.1667
254	4	38	50
254	4	39	66.6667
254	4	40	66.6667
254	4	41	79.1667
254	4	42	79.1667
254	4	43	83.3333
254	4	44	75
254	4	45	70.8333
254	4	46	58.3333
254	4	47	83.3333
254	4	48	79.1667
254	4	49	83.3333
254	4	50	87.5
254	4	51	79.1667
254	4	52	83.3333
254	4	53	75
254	4	54	79.1667
254	4	55	95.8333
257	4	1	0
257	4	2	0
257	4	3	0
257	4	4	0
257	4	5	0
257	4	6	0
257	4	7	0
257	4	8	4.16667
257	4	9	8.33333
257	4	10	16.6667
257	4	11	29.1667
257	4	12	54.1667
257	4	13	54.1667
257	4	14	62.5
257	4	15	58.3333
257	4	16	70.8333
257	4	17	66.6667
257	4	18	62.5
257	4	19	66.6667
257	4	20	75
257	4	21	91.6667
257	4	22	70.8333
257	4	23	87.5
257	4	24	91.6667
257	4	25	91.6667
257	4	26	95.8333
257	4	27	95.8333
257	4	28	95.8333
257	4	29	95.8333
257	4	30	87.5
257	4	31	83.3333
257	4	32	91.6667
257	4	33	95.8333
257	4	34	95.8333
257	4	35	100
257	4	36	95.8333
257	4	37	100
257	4	38	100
257	4	39	91.6667
257	4	40	95.8333
257	4	41	95.8333
257	4	42	95.8333
257	4	43	100
257	4	44	100
257	4	45	100
257	4	46	100
257	4	47	100
257	4	48	100
257	4	49	95.8333
257	4	50	100
257	4	51	100
257	4	52	100
257	4	53	100
257	4	54	100
257	4	55	95.8333
1056	4	1	45.8333
1056	4	2	33.3333
1056	4	3	41.6667
1056	4	4	37.5
1056	4	5	25
1056	4	6	37.5
1056	4	7	20.8333
1056	4	8	29.1667
1056	4	9	29.1667
1056	4	10	20.8333
1056	4	11	25
1056	4	12	20.8333
1056	4	13	16.6667
1056	4	14	20.8333
1056	4	15	29.1667
1056	4	16	8.33333
1056	4	17	20.8333
1056	4	18	25
1056	4	19	20.8333
1056	4	20	20.8333
1056	4	21	29.1667
1056	4	22	4.16667
1056	4	23	25
1056	4	24	29.1667
1056	4	25	16.6667
1056	4	26	20.8333
1056	4	27	41.6667
1056	4	28	50
1056	4	29	29.1667
1056	4	30	29.1667
1056	4	31	45.8333
1056	4	32	37.5
1056	4	33	45.8333
1056	4	34	8.33333
1056	4	35	33.3333
1056	4	36	45.8333
1056	4	37	25
1056	4	38	33.3333
1056	4	39	37.5
1056	4	40	41.6667
1056	4	41	33.3333
1056	4	42	33.3333
1056	4	43	41.6667
1056	4	44	37.5
1056	4	45	41.6667
1056	4	46	33.3333
1056	4	47	50
1056	4	48	33.3333
1056	4	49	50
1056	4	50	33.3333
1056	4	51	41.6667
1056	4	52	54.1667
1056	4	53	41.6667
1056	4	54	50
1056	4	55	37.5
4074	4	1	25
4074	4	2	20.8333
4074	4	3	20.8333
4074	4	4	16.6667
4074	4	5	4.16667
4074	4	6	4.16667
4074	4	7	8.33333
4074	4	8	8.33333
4074	4	9	8.33333
4074	4	10	20.8333
4074	4	11	25
4074	4	12	37.5
4074	4	13	20.8333
4074	4	14	45.8333
4074	4	15	50
4074	4	16	45.8333
4074	4	17	50
4074	4	18	33.3333
4074	4	19	62.5
4074	4	20	62.5
4074	4	21	37.5
4074	4	22	54.1667
4074	4	23	50
4074	4	24	70.8333
4074	4	25	54.1667
4074	4	26	54.1667
4074	4	27	45.8333
4074	4	28	58.3333
4074	4	29	54.1667
4074	4	30	58.3333
4074	4	31	50
4074	4	32	54.1667
4074	4	33	54.1667
4074	4	34	58.3333
4074	4	35	54.1667
4074	4	36	58.3333
4074	4	37	62.5
4074	4	38	54.1667
4074	4	39	54.1667
4074	4	40	50
4074	4	41	58.3333
4074	4	42	66.6667
4074	4	43	62.5
4074	4	44	58.3333
4074	4	45	54.1667
4074	4	46	58.3333
4074	4	47	58.3333
4074	4	48	70.8333
4074	4	49	66.6667
4074	4	50	70.8333
4074	4	51	70.8333
4074	4	52	87.5
4074	4	53	62.5
4074	4	54	70.8333
4074	4	55	66.6667
19227	4	1	16.6667
19227	4	2	16.6667
19227	4	3	8.33333
19227	4	4	25
19227	4	5	16.6667
19227	4	6	16.6667
19227	4	7	25
19227	4	8	16.6667
19227	4	9	8.33333
19227	4	10	20.8333
19227	4	11	20.8333
19227	4	12	45.8333
19227	4	13	41.6667
19227	4	14	41.6667
19227	4	15	50
19227	4	16	58.3333
19227	4	17	54.1667
19227	4	18	54.1667
19227	4	19	54.1667
19227	4	20	45.8333
19227	4	21	50
19227	4	22	66.6667
19227	4	23	58.3333
19227	4	24	66.6667
19227	4	25	70.8333
19227	4	26	70.8333
19227	4	27	54.1667
19227	4	28	75
19227	4	29	70.8333
19227	4	30	66.6667
19227	4	31	66.6667
19227	4	32	66.6667
19227	4	33	75
19227	4	34	66.6667
19227	4	35	62.5
19227	4	36	79.1667
19227	4	37	79.1667
19227	4	38	70.8333
19227	4	39	70.8333
19227	4	40	75
19227	4	41	91.6667
19227	4	42	54.1667
19227	4	43	79.1667
19227	4	44	70.8333
19227	4	45	79.1667
19227	4	46	83.3333
19227	4	47	70.8333
19227	4	48	58.3333
19227	4	49	75
19227	4	50	83.3333
19227	4	51	66.6667
19227	4	52	75
19227	4	53	83.3333
19227	4	54	66.6667
19227	4	55	75
19229	4	1	8.33333
19229	4	2	0
19229	4	3	0
19229	4	4	4.16667
19229	4	5	4.16667
19229	4	6	8.33333
19229	4	7	20.8333
19229	4	8	29.1667
19229	4	9	0
19229	4	10	29.1667
19229	4	11	37.5
19229	4	12	41.6667
19229	4	13	41.6667
19229	4	14	45.8333
19229	4	15	58.3333
19229	4	16	58.3333
19229	4	17	62.5
19229	4	18	79.1667
19229	4	19	79.1667
19229	4	20	79.1667
19229	4	21	79.1667
19229	4	22	75
19229	4	23	87.5
19229	4	24	87.5
19229	4	25	91.6667
19229	4	26	95.8333
19229	4	27	95.8333
19229	4	28	95.8333
19229	4	29	100
19229	4	30	100
19229	4	31	100
19229	4	32	100
19229	4	33	100
19229	4	34	100
19229	4	35	100
19229	4	36	95.8333
19229	4	37	95.8333
19229	4	38	95.8333
19229	4	39	95.8333
19229	4	40	100
19229	4	41	100
19229	4	42	95.8333
19229	4	43	95.8333
19229	4	44	87.5
19229	4	45	100
19229	4	46	100
19229	4	47	95.8333
19229	4	48	100
19229	4	49	95.8333
19229	4	50	100
19229	4	51	100
19229	4	52	100
19229	4	53	100
19229	4	54	100
19229	4	55	100
22642	4	1	0
22642	4	2	0
22642	4	3	4.16667
22642	4	4	0
22642	4	5	4.16667
22642	4	6	0
22642	4	7	8.33333
22642	4	8	12.5
22642	4	9	33.3333
22642	4	10	41.6667
22642	4	11	54.1667
22642	4	12	75
22642	4	13	83.3333
22642	4	14	87.5
22642	4	15	100
22642	4	16	83.3333
22642	4	17	83.3333
22642	4	18	95.8333
22642	4	19	95.8333
22642	4	20	95.8333
22642	4	21	87.5
22642	4	22	100
22642	4	23	95.8333
22642	4	24	95.8333
22642	4	25	95.8333
22642	4	26	100
22642	4	27	100
22642	4	28	95.8333
22642	4	29	100
22642	4	30	100
22642	4	31	100
22642	4	32	100
22642	4	33	100
22642	4	34	91.6667
22642	4	35	100
22642	4	36	100
22642	4	37	100
22642	4	38	91.6667
22642	4	39	100
22642	4	40	100
22642	4	41	95.8333
22642	4	42	100
22642	4	43	100
22642	4	44	95.8333
22642	4	45	100
22642	4	46	91.6667
22642	4	47	100
22642	4	48	100
22642	4	49	95.8333
22642	4	50	100
22642	4	51	100
22642	4	52	100
22642	4	53	100
22642	4	54	100
22642	4	55	100
20	5	1	45.8333
20	5	2	50
20	5	3	50
20	5	4	50
20	5	5	50
20	5	6	50
20	5	7	54.1667
20	5	8	50
20	5	9	50
20	5	10	50
20	5	11	50
20	5	12	50
20	5	13	50
20	5	14	50
20	5	15	50
20	5	16	50
20	5	17	50
20	5	18	50
20	5	19	50
20	5	20	54.1667
20	5	21	50
135	5	1	83.3333
135	5	2	95.8333
135	5	3	91.6667
135	5	4	95.8333
135	5	5	79.1667
135	5	6	100
135	5	7	75
135	5	8	83.3333
135	5	9	75
135	5	10	75
135	5	11	70.8333
135	5	12	54.1667
135	5	13	58.3333
135	5	14	75
135	5	15	79.1667
135	5	16	70.8333
135	5	17	83.3333
135	5	18	66.6667
135	5	19	75
135	5	20	83.3333
135	5	21	70.8333
245	5	1	95.8333
245	5	2	100
245	5	3	100
245	5	4	100
245	5	5	100
245	5	6	100
245	5	7	100
245	5	8	100
245	5	9	100
245	5	10	100
245	5	11	95.8333
245	5	12	100
245	5	13	100
245	5	14	100
245	5	15	100
245	5	16	100
245	5	17	100
245	5	18	91.6667
245	5	19	95.8333
245	5	20	100
245	5	21	100
254	5	1	100
254	5	2	95.8333
254	5	3	91.6667
254	5	4	95.8333
254	5	5	87.5
254	5	6	91.6667
254	5	7	91.6667
254	5	8	83.3333
254	5	9	83.3333
254	5	10	87.5
254	5	11	95.8333
254	5	12	87.5
254	5	13	95.8333
254	5	14	75
254	5	15	83.3333
254	5	16	91.6667
254	5	17	95.8333
254	5	18	87.5
254	5	19	91.6667
254	5	20	91.6667
254	5	21	87.5
257	5	1	95.8333
257	5	2	100
257	5	3	100
257	5	4	100
257	5	5	100
257	5	6	95.8333
257	5	7	100
257	5	8	100
257	5	9	100
257	5	10	95.8333
257	5	11	95.8333
257	5	12	95.8333
257	5	13	100
257	5	14	100
257	5	15	100
257	5	16	95.8333
257	5	17	100
257	5	18	95.8333
257	5	19	95.8333
257	5	20	95.8333
257	5	21	100
1056	5	1	8.33333
1056	5	2	37.5
1056	5	3	50
1056	5	4	66.6667
1056	5	5	29.1667
1056	5	6	50
1056	5	7	45.8333
1056	5	8	50
1056	5	9	37.5
1056	5	10	50
1056	5	11	50
1056	5	12	33.3333
1056	5	13	54.1667
1056	5	14	45.8333
1056	5	15	37.5
1056	5	16	33.3333
1056	5	17	37.5
1056	5	18	66.6667
1056	5	19	50
1056	5	20	50
1056	5	21	54.1667
4074	5	1	50
4074	5	2	62.5
4074	5	3	83.3333
4074	5	4	83.3333
4074	5	5	83.3333
4074	5	6	75
4074	5	7	62.5
4074	5	8	79.1667
4074	5	9	87.5
4074	5	10	100
4074	5	11	79.1667
4074	5	12	87.5
4074	5	13	79.1667
4074	5	14	91.6667
4074	5	15	83.3333
4074	5	16	83.3333
4074	5	17	75
4074	5	18	91.6667
4074	5	19	83.3333
4074	5	20	62.5
4074	5	21	79.1667
19227	5	1	75
19227	5	2	79.1667
19227	5	3	75
19227	5	4	87.5
19227	5	5	79.1667
19227	5	6	75
19227	5	7	66.6667
19227	5	8	33.3333
19227	5	9	79.1667
19227	5	10	75
19227	5	11	75
19227	5	12	75
19227	5	13	70.8333
19227	5	14	62.5
19227	5	15	62.5
19227	5	16	70.8333
19227	5	17	58.3333
19227	5	18	75
19227	5	19	75
19227	5	20	70.8333
19227	5	21	79.1667
19229	5	1	87.5
19229	5	2	75
19229	5	3	91.6667
19229	5	4	100
19229	5	5	91.6667
19229	5	6	95.8333
19229	5	7	79.1667
19229	5	8	33.3333
19229	5	9	100
19229	5	10	95.8333
19229	5	11	95.8333
19229	5	12	100
19229	5	13	83.3333
19229	5	14	70.8333
19229	5	15	95.8333
19229	5	16	83.3333
19229	5	17	91.6667
19229	5	18	95.8333
19229	5	19	83.3333
19229	5	20	83.3333
19229	5	21	66.6667
22642	5	1	87.5
22642	5	2	100
22642	5	3	100
22642	5	4	100
22642	5	5	95.8333
22642	5	6	100
22642	5	7	75
22642	5	8	100
22642	5	9	95.8333
22642	5	10	100
22642	5	11	100
22642	5	12	100
22642	5	13	95.8333
22642	5	14	95.8333
22642	5	15	100
22642	5	16	91.6667
22642	5	17	87.5
22642	5	18	95.8333
22642	5	19	91.6667
22642	5	20	91.6667
22642	5	21	100
20	6	1	50
20	6	2	54.1667
20	6	3	50
20	6	4	50
20	6	5	37.5
20	6	6	58.3333
20	6	7	62.5
20	6	8	45.8333
20	6	9	58.3333
20	6	10	45.8333
20	6	11	54.1667
20	6	12	54.1667
20	6	13	66.6667
20	6	14	75
20	6	15	66.6667
20	6	16	62.5
20	6	17	50
20	6	18	45.8333
20	6	19	41.6667
20	6	20	50
20	6	21	62.5
20	6	22	54.1667
20	6	23	41.6667
135	6	1	95.8333
135	6	2	79.1667
135	6	3	91.6667
135	6	4	87.5
135	6	5	87.5
135	6	6	66.6667
135	6	7	83.3333
135	6	8	66.6667
135	6	9	79.1667
135	6	10	62.5
135	6	11	87.5
135	6	12	79.1667
135	6	13	87.5
135	6	14	75
135	6	15	75
135	6	16	79.1667
135	6	17	75
135	6	18	75
135	6	19	79.1667
135	6	20	83.3333
135	6	21	58.3333
135	6	22	83.3333
135	6	23	58.3333
245	6	1	100
245	6	2	91.6667
245	6	3	95.8333
245	6	4	95.8333
245	6	5	95.8333
245	6	6	95.8333
245	6	7	95.8333
245	6	8	95.8333
245	6	9	100
245	6	10	91.6667
245	6	11	100
245	6	12	25
245	6	13	4.16667
245	6	14	95.8333
245	6	15	87.5
245	6	16	95.8333
245	6	17	91.6667
245	6	18	50
245	6	19	33.3333
245	6	20	45.8333
245	6	21	41.6667
245	6	22	37.5
245	6	23	41.6667
254	6	1	79.1667
254	6	2	79.1667
254	6	3	79.1667
254	6	4	95.8333
254	6	5	75
254	6	6	91.6667
254	6	7	87.5
254	6	8	91.6667
254	6	9	91.6667
254	6	10	83.3333
254	6	11	75
254	6	12	79.1667
254	6	13	79.1667
254	6	14	79.1667
254	6	15	66.6667
254	6	16	75
254	6	17	70.8333
254	6	18	66.6667
254	6	19	79.1667
254	6	20	62.5
254	6	21	66.6667
254	6	22	62.5
254	6	23	70.8333
257	6	1	100
257	6	2	100
257	6	3	100
257	6	4	100
257	6	5	100
257	6	6	100
257	6	7	100
257	6	8	100
257	6	9	100
257	6	10	100
257	6	11	100
257	6	12	100
257	6	13	100
257	6	14	100
257	6	15	100
257	6	16	100
257	6	17	100
257	6	18	100
257	6	19	100
257	6	20	100
257	6	21	100
257	6	22	100
257	6	23	100
1056	6	1	58.3333
1056	6	2	62.5
1056	6	3	66.6667
1056	6	4	50
1056	6	5	45.8333
1056	6	6	58.3333
1056	6	7	41.6667
1056	6	8	79.1667
1056	6	9	54.1667
1056	6	10	50
1056	6	11	54.1667
1056	6	12	58.3333
1056	6	13	62.5
1056	6	14	58.3333
1056	6	15	50
1056	6	16	62.5
1056	6	17	54.1667
1056	6	18	54.1667
1056	6	19	54.1667
1056	6	20	62.5
1056	6	21	66.6667
1056	6	22	54.1667
1056	6	23	70.8333
4074	6	1	87.5
4074	6	2	91.6667
4074	6	3	83.3333
4074	6	4	75
4074	6	5	87.5
4074	6	6	87.5
4074	6	7	83.3333
4074	6	8	87.5
4074	6	9	87.5
4074	6	10	79.1667
4074	6	11	83.3333
4074	6	12	83.3333
4074	6	13	75
4074	6	14	87.5
4074	6	15	79.1667
4074	6	16	75
4074	6	17	70.8333
4074	6	18	83.3333
4074	6	19	66.6667
4074	6	20	70.8333
4074	6	21	79.1667
4074	6	22	79.1667
4074	6	23	70.8333
19227	6	1	87.5
19227	6	2	70.8333
19227	6	3	70.8333
19227	6	4	75
19227	6	5	66.6667
19227	6	6	75
19227	6	7	70.8333
19227	6	8	58.3333
19227	6	9	62.5
19227	6	10	87.5
19227	6	11	87.5
19227	6	12	70.8333
19227	6	13	75
19227	6	14	70.8333
19227	6	15	70.8333
19227	6	16	79.1667
19227	6	17	62.5
19227	6	18	66.6667
19227	6	19	70.8333
19227	6	20	79.1667
19227	6	21	66.6667
19227	6	22	79.1667
19227	6	23	70.8333
19229	6	1	100
19229	6	2	100
19229	6	3	95.8333
19229	6	4	91.6667
19229	6	5	95.8333
19229	6	6	100
19229	6	7	91.6667
19229	6	8	95.8333
19229	6	9	91.6667
19229	6	10	95.8333
19229	6	11	75
19229	6	12	66.6667
19229	6	13	70.8333
19229	6	14	79.1667
19229	6	15	79.1667
19229	6	16	83.3333
19229	6	17	66.6667
19229	6	18	83.3333
19229	6	19	75
19229	6	20	62.5
19229	6	21	75
19229	6	22	79.1667
19229	6	23	75
22642	6	1	100
22642	6	2	91.6667
22642	6	3	100
22642	6	4	95.8333
22642	6	5	95.8333
22642	6	6	91.6667
22642	6	7	100
22642	6	8	91.6667
22642	6	9	91.6667
22642	6	10	95.8333
22642	6	11	91.6667
22642	6	12	87.5
22642	6	13	75
22642	6	14	83.3333
22642	6	15	66.6667
22642	6	16	87.5
22642	6	17	83.3333
22642	6	18	62.5
22642	6	19	58.3333
22642	6	20	54.1667
22642	6	21	45.8333
22642	6	22	50
22642	6	23	54.1667

## Sheet: Exp 2 Choice
Percent Choice Discriminative Alternative for Each Subject Across Sessions
Phase 1	20	135	245	254	257	1056	4074	19227	19229	22642
1	4.16667	16.6667	25	8.33333	0	45.8333	25	16.6667	8.33333	0
2	0	8.33333	16.6667	16.6667	0	33.3333	20.8333	16.6667	0	0
3	0	8.33333	8.33333	4.16667	0	41.6667	20.8333	8.33333	0	4.16667
4	0	8.33333	16.6667	12.5	0	37.5	16.6667	25	4.16667	0
5	0	20.8333	0	20.8333	0	25	4.16667	16.6667	4.16667	4.16667
6	8.33333	20.8333	4.16667	16.6667	0	37.5	4.16667	16.6667	8.33333	0
7	4.16667	25	4.16667	29.1667	0	20.8333	8.33333	25	20.8333	8.33333
8	25	41.6667	4.16667	37.5	4.16667	29.1667	8.33333	16.6667	29.1667	12.5
9	25	45.8333	4.16667	45.8333	8.33333	29.1667	8.33333	8.33333	0	33.3333
10	29.1667	45.8333	4.16667	45.8333	16.6667	20.8333	20.8333	20.8333	29.1667	41.6667
11	33.3333	45.8333	33.3333	41.6667	29.1667	25	25	20.8333	37.5	54.1667
12	41.6667	50	29.1667	50	54.1667	20.8333	37.5	45.8333	41.6667	75
13	41.6667	45.8333	29.1667	45.8333	54.1667	16.6667	20.8333	41.6667	41.6667	83.3333
14	41.6667	50	41.6667	45.8333	62.5	20.8333	45.8333	41.6667	45.8333	87.5
15	37.5	50	45.8333	54.1667	58.3333	29.1667	50	50	58.3333	100
16	33.3333	50	37.5	33.3333	70.8333	8.33333	45.8333	58.3333	58.3333	83.3333
17	45.8333	41.6667	50	66.6667	66.6667	20.8333	50	54.1667	62.5	83.3333
18	41.6667	58.3333	58.3333	50	62.5	25	33.3333	54.1667	79.1667	95.8333
19	45.8333	54.1667	50	50	66.6667	20.8333	62.5	54.1667	79.1667	95.8333
20	50	50	66.6667	45.8333	75	20.8333	62.5	45.8333	79.1667	95.8333
21	37.5	50	62.5	50	91.6667	29.1667	37.5	50	79.1667	87.5
22	50	50	79.1667	58.3333	70.8333	4.16667	54.1667	66.6667	75	100
23	41.6667	50	87.5	50	87.5	25	50	58.3333	87.5	95.8333
24	37.5	54.1667	75	45.8333	91.6667	29.1667	70.8333	66.6667	87.5	95.8333
25	41.6667	62.5	75	66.6667	91.6667	16.6667	54.1667	70.8333	91.6667	95.8333
26	45.8333	75	70.8333	62.5	95.8333	20.8333	54.1667	70.8333	95.8333	100
27	50	62.5	79.1667	62.5	95.8333	41.6667	45.8333	54.1667	95.8333	100
28	50	54.1667	75	70.8333	95.8333	50	58.3333	75	95.8333	95.8333
29	50	70.8333	75	83.3333	95.8333	29.1667	54.1667	70.8333	100	100
30	50	62.5	79.1667	70.8333	87.5	29.1667	58.3333	66.6667	100	100
31	50	62.5	87.5	41.6667	83.3333	45.8333	50	66.6667	100	100
32	50	62.5	79.1667	75	91.6667	37.5	54.1667	66.6667	100	100
33	50	70.8333	91.6667	66.6667	95.8333	45.8333	54.1667	75	100	100
34	50	66.6667	91.6667	70.8333	95.8333	8.33333	58.3333	66.6667	100	91.6667
35	50	70.8333	79.1667	62.5	100	33.3333	54.1667	62.5	100	100
36	45.8333	87.5	87.5	75	95.8333	45.8333	58.3333	79.1667	95.8333	100
37	50	70.8333	91.6667	54.1667	100	25	62.5	79.1667	95.8333	100
38	50	66.6667	95.8333	50	100	33.3333	54.1667	70.8333	95.8333	91.6667
39	45.8333	58.3333	100	66.6667	91.6667	37.5	54.1667	70.8333	95.8333	100
40	41.6667	75	91.6667	66.6667	95.8333	41.6667	50	75	100	100
41	50	58.3333	100	79.1667	95.8333	33.3333	58.3333	91.6667	100	95.8333
42	50	70.8333	87.5	79.1667	95.8333	33.3333	66.6667	54.1667	95.8333	100
43	50	79.1667	100	83.3333	100	41.6667	62.5	79.1667	95.8333	100
44	50	75	91.6667	75	100	37.5	58.3333	70.8333	87.5	95.8333
45	45.8333	70.8333	100	70.8333	100	41.6667	54.1667	79.1667	100	100
46	45.8333	87.5	100	58.3333	100	33.3333	58.3333	83.3333	100	91.6667
47	50	87.5	95.8333	83.3333	100	50	58.3333	70.8333	95.8333	100
48	54.1667	87.5	100	79.1667	100	33.3333	70.8333	58.3333	100	100
49	54.1667	87.5	100	83.3333	95.8333	50	66.6667	75	95.8333	95.8333
50	50	83.3333	100	87.5	100	33.3333	70.8333	83.3333	100	100
51	50	79.1667	91.6667	79.1667	100	41.6667	70.8333	66.6667	100	100
52	50	91.6667	100	83.3333	100	54.1667	87.5	75	100	100
53	54.1667	87.5	100	75	100	41.6667	62.5	83.3333	100	100
54	50	75	95.8333	79.1667	100	50	70.8333	66.6667	100	100
55	45.8333	91.6667	95.8333	95.8333	95.8333	37.5	66.6667	75	100	100
Phase 2	20	135	245	254	257	1056	4074	19227	19229	22642
56	45.8333	83.3333	95.8333	100	95.8333	8.33333	50	75	87.5	87.5
57	50	95.8333	100	95.8333	100	37.5	62.5	79.1667	75	100
58	50	91.6667	100	91.6667	100	50	83.3333	75	91.6667	100
59	50	95.8333	100	95.8333	100	66.6667	83.3333	87.5	100	100
60	50	79.1667	100	87.5	100	29.1667	83.3333	79.1667	91.6667	95.8333
61	50	100	100	91.6667	95.8333	50	75	75	95.8333	100
62	54.1667	75	100	91.6667	100	45.8333	62.5	66.6667	79.1667	75
63	50	83.3333	100	83.3333	100	50	79.1667	33.3333	33.3333	100
64	50	75	100	83.3333	100	37.5	87.5	79.1667	100	95.8333
65	50	75	100	87.5	95.8333	50	100	75	95.8333	100
66	50	70.8333	95.8333	95.8333	95.8333	50	79.1667	75	95.8333	100
67	50	54.1667	100	87.5	95.8333	33.3333	87.5	75	100	100
68	50	58.3333	100	95.8333	100	54.1667	79.1667	70.8333	83.3333	95.8333
69	50	75	100	75	100	45.8333	91.6667	62.5	70.8333	95.8333
70	50	79.1667	100	83.3333	100	37.5	83.3333	62.5	95.8333	100
71	50	70.8333	100	91.6667	95.8333	33.3333	83.3333	70.8333	83.3333	91.6667
72	50	83.3333	100	95.8333	100	37.5	75	58.3333	91.6667	87.5
73	50	66.6667	91.6667	87.5	95.8333	66.6667	91.6667	75	95.8333	95.8333
74	50	75	95.8333	91.6667	95.8333	50	83.3333	75	83.3333	91.6667
75	54.1667	83.3333	100	91.6667	95.8333	50	62.5	70.8333	83.3333	91.6667
76	50	70.8333	100	87.5	100	54.1667	79.1667	79.1667	66.6667	100
Phase 3	20	135	245	254	257	1056	4074	19227	19229	22642
77	50	95.8333	100	79.1667	100	58.3333	87.5	87.5	100	100
78	54.1667	79.1667	91.6667	79.1667	100	62.5	91.6667	70.8333	100	91.6667
79	50	91.6667	95.8333	79.1667	100	66.6667	83.3333	70.8333	95.8333	100
80	50	87.5	95.8333	95.8333	100	50	75	75	91.6667	95.8333
81	37.5	87.5	95.8333	75	100	45.8333	87.5	66.6667	95.8333	95.8333
82	58.3333	66.6667	95.8333	91.6667	100	58.3333	87.5	75	100	91.6667
83	62.5	83.3333	95.8333	87.5	100	41.6667	83.3333	70.8333	91.6667	100
84	45.8333	66.6667	95.8333	91.6667	100	79.1667	87.5	58.3333	95.8333	91.6667
85	58.3333	79.1667	100	91.6667	100	54.1667	87.5	62.5	91.6667	91.6667
86	45.8333	62.5	91.6667	83.3333	100	50	79.1667	87.5	95.8333	95.8333
87	54.1667	87.5	100	75	100	54.1667	83.3333	87.5	75	91.6667
88	54.1667	79.1667	25	79.1667	100	58.3333	83.3333	70.8333	66.6667	87.5
89	66.6667	87.5	4.16667	79.1667	100	62.5	75	75	70.8333	75
90	75	75	95.8333	79.1667	100	58.3333	87.5	70.8333	79.1667	83.3333
91	66.6667	75	87.5	66.6667	100	50	79.1667	70.8333	79.1667	66.6667
92	62.5	79.1667	95.8333	75	100	62.5	75	79.1667	83.3333	87.5
93	50	75	91.6667	70.8333	100	54.1667	70.8333	62.5	66.6667	83.3333
94	45.8333	75	50	66.6667	100	54.1667	83.3333	66.6667	83.3333	62.5
95	41.6667	79.1667	33.3333	79.1667	100	54.1667	66.6667	70.8333	75	58.3333
96	50	83.3333	45.8333	62.5	100	62.5	70.8333	79.1667	62.5	54.1667
97	62.5	58.3333	41.6667	66.6667	100	66.6667	79.1667	66.6667	75	45.8333
98	54.1667	83.3333	37.5	62.5	100	54.1667	79.1667	79.1667	79.1667	50
99	41.6667	58.3333	41.6667	70.8333	100	70.8333	70.8333	70.8333	75	54.1667

## Sheet: Exp 2 Latency
Average Latencies to Respond to the Discrimiantive Alternative's Initial Link during Forced Choice Trials on the Last 5 Sessions of Each Phase for Each Subject														Average Latencies to Respond to the Nondiscrimiantive Alternative's Initial Link during Forced Choice Trials on the Last 5 Sessions of Each Phase for Each Subject
Phase 1 Measured (centiseconds, .01")	20	135	245	254	257	1056	4074	19227	19229	22642				Phase 1 Measured (centiseconds, .01")	20	135	245	254	257	1056	4074	19227	19229	22642
51	1147.17	146.875	244.292	178.083	192.75	758.583	135.625	237.792	112.083	617.375				51	1268.35	583.652	1380.22	210.5	700.083	4201.96	1734.08	353.217	2261.42	462.174
52	268.708	139.167	301.042	472.375	347.75	2274.62	732.417	254.958	129.375	92.7083				52	379.833	409.042	110.625	889.833	878.667	1921.17	1173.22	2163.52	4258.65	530.696
53	286.958	122.417	345.458	977.458	148.458	4164.96	239.208	182.792	125.417	71.2917				53	827.667	226.458	385.792	712.833	514.125	1183.08	437.87	1138.79	3441.96	191.652
54	620.792	98.25	73.125	715.583	1346.88	1381.38	142.625	237.792	144.875	79.25				54	389.792	585.875	191	487.625	610.833	228.833	293.208	353.217	1578.83	192.13
55	227.792	166.875	335.708	1983.71	222.583	266.375	165.125	1550.29	197.333	92.375				55	420.5	439.083	114.417	341.542	287.292	465.667	1222.08	1150.96	1804.79	171.458
Phase 1 Converted & Logged (seconds, 1.00")	20	135	245	254	257	1056	4074	19227	19229	22642				Phase 1 Converted & Logged (seconds, 1.00")	20	135	245	254	257	1056	4074	19227	19229	22642
51	1.05963	0.166948	0.387909	0.250623	0.284994	0.880003	0.13234	0.376197	0.049541	0.790549				51	1.10324	0.766154	1.13995	0.323252	0.84515	1.62345	1.23907	0.548042	1.35438	0.664805
52	0.429281	0.143535	0.478627	0.674287	0.541267	1.35691	0.864758	0.406469	0.11185	-0.0328812				52	0.579593	0.611768	0.0438533	0.949309	0.943824	1.28357	1.06938	1.33516	1.62927	0.724846
53	0.457819	0.0878405	0.538396	0.990098	0.171605	1.61961	0.378776	0.261956	0.0983553	-0.146961				53	0.917855	0.354988	0.586353	0.852988	0.711069	1.07302	0.641345	1.05644	1.53681	0.282514
54	0.792946	-0.00766744	-0.135934	0.85466	1.12933	1.14031	0.154196	0.376197	0.160993	-0.101001				54	0.590833	0.767805	0.281033	0.688086	0.785923	0.359519	0.467176	0.548042	1.19834	0.283596
55	0.357538	0.222391	0.525962	1.29748	0.347493	0.425493	0.217813	1.19041	0.2952	-0.0344455				55	0.623766	0.642547	0.0584893	0.533444	0.458323	0.668075	1.0871	1.06106	1.25643	0.234159
Phase 2 Measured (centiseconds, .01")	20	135	245	254	257	1056	4074	19227	19229	22642				Phase 2 Measured (centiseconds, .01")	20	135	245	254	257	1056	4074	19227	19229	22642
72	847.333	94.8333	92.2083	224.083	180.167	3000.33	373.5	241.625	185.125	120				72	494.625	295.958	105.75	1938.71	195.792	483.125	174.333	572.292	2011	1442.25
73	244.958	248.083	513.625	344.292	191.75	1328.08	274.667	300.333	162.167	92.125				73	326.042	339.417	154.667	965.125	1168.96	418.125	729.167	245.292	910.083	319.333
74	273.75	104.375	121.708	499.167	1086.29	659	1264.12	294.792	179.167	77.5				74	467.542	170.292	176.958	845.125	270.958	357.417	509.75	434.875	718.583	147.292
75	284.208	83.7083	162.417	366.292	794.75	202.417	2430.04	776.458	193.208	97.7083				75	556.75	121.292	133.5	1119.04	854.875	160.25	2197.71	770.625	2024.58	168.792
76	291.25	146.083	123.292	805.583	419.75	937.5	456.708	474.958	281.542	108.458				76	358.125	176.125	179.167	805.917	848.042	383.208	718.125	585.542	638.417	171.958
Phase 2 Converted & Logged (seconds, 1.00")	20	135	245	254	257	1056	4074	19227	19229	22642				Phase 2 Converted & Logged (seconds, 1.00")	20	135	245	254	257	1056	4074	19227	19229	22642
72	0.928054	-0.023039	-0.0352298	0.35041	0.255674	1.47717	0.572291	0.383142	0.267465	0.0791812				72	0.694276	0.471231	0.0242804	1.28751	0.291794	0.68406	0.24138	0.757617	1.30341	1.15904
73	0.389092	0.394598	0.710646	0.536927	0.282735	1.12323	0.438806	0.477604	0.209962	-0.0356225				73	0.513273	0.530733	0.189397	0.984584	1.0678	0.621306	0.862827	0.389683	0.959081	0.504244
74	0.437354	0.0185965	0.0853203	0.698246	1.03595	0.818885	1.10179	0.469515	0.253257	-0.110698				74	0.66982	0.231193	0.247871	0.926921	0.432903	0.553175	0.707357	0.638364	0.856477	0.168178
75	0.453637	-0.0772313	0.210631	0.563827	0.900231	0.306246	1.38561	0.890118	0.286026	-0.0100684				75	0.74566	0.083831	0.125481	1.04885	0.931903	0.204798	1.34197	0.886843	1.30634	0.227351
76	0.464266	0.164601	0.0909337	0.90611	0.622991	0.971971	0.659639	0.676656	0.449543	0.0352629				76	0.554035	0.245821	0.253257	0.90629	0.928417	0.583435	0.8562	0.767558	0.805104	0.235423
Phase 3 Measured (centiseconds, .01")	20	135	245	254	257	1056	4074	19227	19229	22642				Phase 3 Measured (centiseconds, .01")	20	135	245	254	257	1056	4074	19227	19229	22642
95	360.708	158.333	122.64	114.792	2095.75	213.292	1065.46	245.708	359.417	94.7917				95	252.667	188.792	86.1364	549	435.083	504.625	697.333	473.292	1154.5	216.5
96	322.083	144.167	120.958	133.917	125.708	93.8333	56	199.667	2266.96	125.708				96	495.667	273.958	164.318	192.375	611.167	172.667	2523.29	346.708	2847.17	266.792
97	292.083	152.708	371.333	153	136.042	132.833	288.333	418.917	141.333	126.333				97	450.083	154.583	176.87	376.125	408.708	212.083	332.25	255.042	517.083	107.25
98	232.625	168.917	94.6667	1043.67	123.292	2863.46	99.1667	207.875	122.958	527				98	338.583	151.792	154.208	1312.67	357.042	1239.79	545.458	577.917	245.375	393.25
99	275.708	92.0833	93.5833	156.667	157.75	513.958	159.375	258.333	170.083	582.25				99	228.375	1315.12	158.083	886.458	270.042	428.125	394.042	414.583	433	166.292
Phase 3 Converted & Logged (seconds, 1.00")	20	135	245	254	257	1056	4074	19227	19229	22642				Phase 3 Converted & Logged (seconds, 1.00")	20	135	245	254	257	1056	4074	19227	19229	22642
95	0.557156	0.199572	0.0886321	0.0599104	1.32134	0.328974	1.02754	0.39042	0.555598	-0.0232298				95	0.402548	0.275983	-0.0648135	0.739572	0.638572	0.702969	0.84344	0.675129	1.06239	0.335458
96	0.507968	0.158865	0.0826358	0.126835	0.0993641	-0.0276429	-0.251812	0.300306	1.35544	0.0993641				96	0.69519	0.437685	0.215686	0.284149	0.78616	0.237209	1.40197	0.539964	1.45441	0.426172
97	0.465507	0.183863	0.569764	0.184691	0.133672	0.123307	0.459895	0.622128	0.150245	0.101518				97	0.653293	0.189163	0.247653	0.575332	0.611413	0.326507	0.521465	0.406611	0.713561	0.0303973
98	0.366656	0.227673	-0.0238029	1.01856	0.0909337	1.45689	-0.00363428	0.317802	0.089758	0.721811				98	0.529666	0.181248	0.188108	1.11815	0.552719	1.09335	0.736762	0.761865	0.38983	0.594669
99	0.44045	-0.035819	-0.0288015	0.194977	0.197969	0.710928	0.20242	0.41218	0.230662	0.765109				99	0.358649	1.11897	0.198886	0.947658	0.431431	0.631571	0.595542	0.617612	0.636488	0.22087

## Sheet: Exp 2 Resp Rates
Average Number of Responses to the Discriminative Alternative's Predictive Stimulus during Forced Choice Trials on the Last 5 Session of Each Phase for Each Subject														Average Number of Responses to the Nondiscriminative Alternative's Nonpredictive Stimulus on the Last 5 Forced Choice Trials for Each Subject
Phase 1	20	135	245	254	257	1056	4074	19227	19229	22642				Phase 1	20	135	245	254	257	1056	4074	19227	19229	22642
21	2.33333	21.3333	15.6667	2.33333	9.33333	1.5	10.0833	8.58333	6	8.08333				21	1.45833	20.1667	9.41667	4.41667	12.375	1.375	7.54167	5.54167	10.4583	11.2083
22	0.416667	18.5833	8.83333	0.75	3.75	3.16667	11	6.91667	6.75	7.5				22	0.875	18.5417	8.79167	5.25	9.70833	1.70833	7.20833	7.16667	11.25	11.0833
23	2.5	21.6667	8.25	0.666667	6.33333	1.83333	9.16667	9.91667	7.08333	8.33333				23	0.833333	21.4583	7.66667	5.54167	11.4583	1.625	5.83333	6.45833	9.25	13.4167
24	0.5	22.25	11.75	1	9.41667	2.41667	7.83333	8.58333	7.83333	5.66667				24	1.41667	19.8333	7.29167	5.29167	7.375	1.41667	6.75	5.54167	11.5833	11.7083
25	1.58333	22.1667	10.3333	0.833333	10	3	8.5	4.25	8.58333	8.33333				25	0.75	19.5	10.8333	5.66667	11.5	2.25	6.91667	4.54167	8.04167	12.875
Phase 2	20	135	245	254	257	1056	4074	19227	19229	22642				Phase 2	20	135	245	254	257	1056	4074	19227	19229	22642
46	4.5	19.9167	9.25	1.25	11.5	1.58333	6.66667	4.58333	3.5	7.83333				46	4.04167	19.4167	11.7917	3.08333	9.83333	0.875	6.5	4.54167	7.04167	10
47	2.5	18.9167	12.6667	1.58333	8.66667	2	6.41667	4.83333	4.58333	7				47	2.20833	18.1667	8	2.79167	10.75	1	6	3.33333	9.25	8.20833
48	1.5	19.4167	12.5833	0.25	10.1667	1.66667	7.66667	5.25	4	6.83333				48	2.125	18.7083	11.1667	2.41667	13.5417	1.29167	6	3.16667	6.625	7.29167
49	2.66667	21.0833	11.4167	0.75	12.8333	1.5	8.5	4.5	3.91667	7.33333				49	2	21.3333	9.25	3.375	18.4583	1.04167	6.5	3.45833	7.25	5.29167
50	2.58333	18.25	9.66667	0.916667	12.5833	1.08333	7.83333	3.41667	3.16667	6.75				50	1.625	17.9583	7.45833	2.33333	12.0417	0.75	6.70833	2.5	6.33333	6.58333
Phase 3	20	135	245	254	257	1056	4074	19227	19229	22642				Phase 3	20	135	245	254	257	1056	4074	19227	19229	22642
62	0.416667	16.4167	6	0.166667	12.5833	1.41667	6.08333	1.66667	4.25	5.25				62	0.333333	16.75	5.20833	5.54167	13.0417	1.04167	3.83333	2.875	2.16667	4.83333
63	1.66667	17.0833	6	0.166667	13.5833	1.75	4.91667	1.33333	5.91667	6.58333				63	0.5	19.2083	4.16667	3.91667	13.5833	0.958333	3.58333	2.04167	4.95833	9
64	0.5	17.4167	6	0.666667	19.1667	2.33333	5.91667	3.16667	5.41667	4.75				64	0.416667	18.8333	3.83333	4.125	19.0833	1.08333	3.20833	3.33333	3.5	6.33333
65	0.583333	18.1667	6	0.166667	15.4167	2.33333	5.08333	1.16667	3.75	5.33333				65	0.583333	18.9583	6.375	2.70833	17.625	1.29167	2.91667	2.66667	2.83333	5.79167
66	1	16.6667	6	0.75	18.3333	1.66667	4.83333	1.66667	3.08333	6.91667				66	0.458333	17.2083	4.16667	2.79167	14.7917	1.04167	2.58333	3.70833	2.58333	8.45833

## Sheet: Tables 1 & 2
Amount of Food Earned for Each Subject Pooled over the Last 5 Sessions of Each Phase in Experiments 1 and 2
Table 1
	50% vs. 50%		25% vs. 50%		12.5% vs. 50%
Subject	Disc. alt.	Nondisc. alt.	Disc. alt.	Nondisc. alt.	Disc. alt.	Nondisc. alt.
20	23.5	12.5	12	12.1	4.9	8.5
135	24	12	11.4	13.3	3.7	13.2
245	20.1	15.9	11.3	13.4	4.4	10.4
254	23.6	12.4	10.2	15.6	4.4	10.6
257	23.7	12.3	11.9	12.2	5	8.2
1056	22.6	13.4	11	14.1	3.8	13
4074	18.5	17.5	9.8	16.4	4	12.1
19227	22.5	13.5	11	14.1	4.2	11.2
19229	23.9	12.1	12	12	4.8	8.7
22642	23.9	12.1	11.9	12.2	4.9	8.3
Mean	22.63	13.37	11.23	13.54	4.4	10.42
Proportion	0.629	0.371	0.453	0.547	0.297	0.703
Table 2
	50% vs. 50%		50% vs. 75%		50% vs. 100%
Subject	Disc. alt.	Nondisc. alt.	Disc. alt.	Nondisc. alt.	Disc. alt.	Nondisc. alt.
20	18	18	18.1	26.8	18	36
135	22.2	13.8	21.1	22.4	20.7	30.6
245	23.6	12.4	23.7	18.4	16.8	45.6
254	21.9	14.1	22.9	19.6	20.2	31.6
257	23.9	12.1	23.7	18.4	24	24
1056	17.4	18.6	18.2	26.7	19.4	33.2
4074	20.6	15.4	21.4	21.9	20.8	30.4
19227	20.8	15.2	20.6	23.1	20.8	30.4
19229	24	12	22.1	20.8	20.8	30.4
22642	24	12	23.2	19.2	18.3	35.4
Mean	21.64	14.36	21.5	21.75	19.98	32.76
Proportion	0.601	0.399	0.497	0.503	0.379	0.621

## Sheet: Matching Model Data
Average Percent Choice of the Discriminative Alternative over the Last 5 Sessions of Each Phase for Each Subject in Experiments 1 and 2
Experiment 1	20	135	245	254	257	1056	4074	19227	19229	22642
1	95.8333	100	67.5	96.6667	97.5	88.3333	54.1667	87.5	99.1667	99.1667
0.5	99.1667	89.1667	88.3333	70	98.3333	82.5	63.3333	82.5	100	98.3333
0.25	95.8333	56.6667	80	78.3333	98.3333	58.3333	65.8333	73.3333	94.1667	97.5
Experiment 2	20	135	245	254	257	1056	4074	19227	19229	22642
1	50	85	96.6667	82.5	99.1667	45	71.6667	73.3333	100	100
0.666667	50.8333	75.8333	97.5	90.8333	97.5	51.6667	78.3333	71.6667	84.1667	93.3333
0.5	50	72.5	40	68.3333	100	61.6667	73.3333	73.3333	73.3333	52.5
